# Supplementary material for: Carbon photochemistry: towards a solar reverse boudouard refinery
Source: Royal Society of Chemistry journal article supplement (doi:10.1039/d2ee03353d), 2023-01-01
Supplement: d2ee03353d1.csv [file d2ee03353d1.csv]

structure/intermediate (as indicated by the number at the beginning of each file)	pristine graphite	1 C vacancy	1 C vacancy_OH_2H	O substituted
0	0.00	0.00	0.00	0.00
1	-0.14	-0.18	-0.22	-0.19
2	3.29	-1.16	2.71	1.78
3	4.33	-0.82	3.72	-0.02
4	4.82	-0.32	4.21	0.45
5	4.60	-0.47	4.01	0.21
6	7.40	1.86	6.12	2.80
7	9.73	-0.71	7.26	3.95
	( all energies are in eV)
